# Supplementary material
Source: PubMed Central journal article supplement (PMC2538952)

## SUPPLEMENTAL MATERIAL

**Figure S1.** Turnover of mtDNA in DRG neurons. DRGs were pulse labeled with BrdU for 4 h and then chased with BrdU-free medium for different periods of time (0, 8, 24, 72 and 96 h). The percentage of BrdU-positive mitochondria (%BrdU<sup>+</sup> mitochondria) was calculated for each axon and the average was found for each time-point (n<sub>0h</sub>= 16, n<sub>8h</sub>=21, n<sub>24h</sub>=7, n<sub>72h</sub>=3, n<sub>96h</sub>=2). The percentage of BrdU<sup>+</sup> mitochondria is indicated on a logarithmic scale and the time of the chase is indicated on a linear scale. Error bars indicate SEM. The half-life of mtDNA was calculated to be 1.5 d using linear regression analysis by the method of least squares ( $y = 37.783e^{-0.014x}$ ).

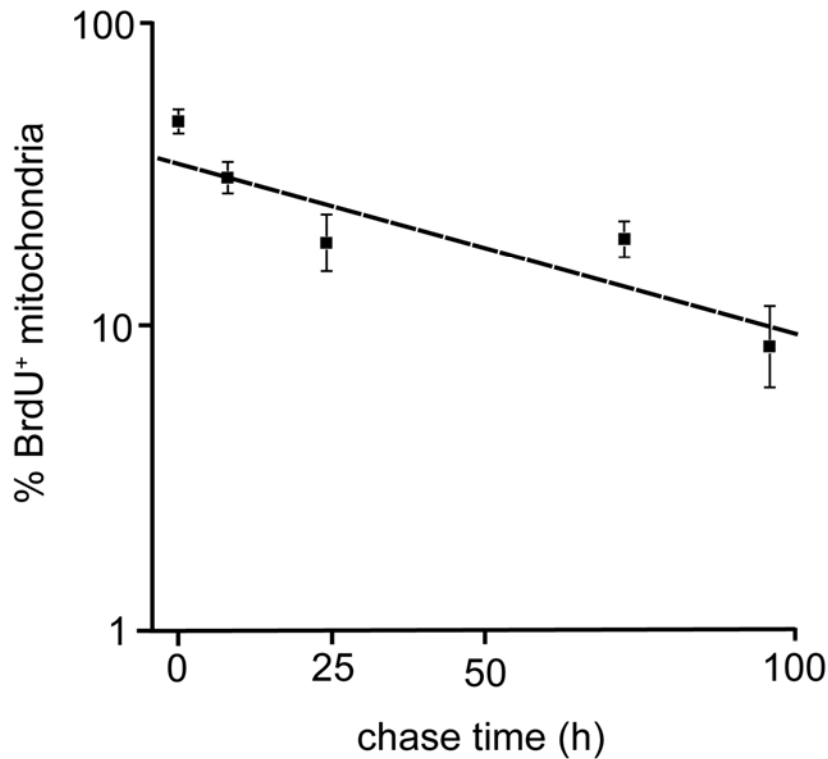

Supplement: NIHMS66247-supplement-supp.pdf [file NIHMS66247-supplement-supp.pdf]
